# Supplementary material for: Role of Dorsomedial Hypothalamus GABAergic Neurons in Sleep–Wake States in Response to Changes in Ambient Temperature in Mice
Source: Int J Mol Sci. 2022 Jan 23;23(3):1270. doi: 10.3390/ijms23031270 (PMC8836016; doi:10.3390/ijms23031270)
Supplement: Supplementary file 1 [file ijms-23-01270-s001.zip]

Archive with 4 entries (4 files):
- Figure S1.tif
- Figure S2.tif
- Figure S3.tif
- ijms-1522563-supplementary.pdf
